# Supplementary material
Source: PubMed Central journal article supplement (PMC8656068)
Supplement: 12879_2021_6894_MOESM1_ESM.pdf [file 12879_2021_6894_MOESM1_ESM.pdf]

Additional File 1: Risk assessment matrix

| Category of risk exposure | Circumstances                                                                                                                                                                                                                                                                                                              |
|---------------------------|----------------------------------------------------------------------------------------------------------------------------------------------------------------------------------------------------------------------------------------------------------------------------------------------------------------------------|
| No identifiable risk      | Healthcare worker without any direct close contact with a confirmed COVID-19 case<br>Did not enter active patient's area<br>Healthcare workers who adhered to the recommended personal protective equipment                                                                                                                |
| Low risk                  | Healthcare workers who had close contact with patients with COVID-19<br><b>AND</b><br>Adhered to the recommended personal protective equipment                                                                                                                                                                             |
| Medium risk               | Healthcare workers who had prolonged close contact with patients with COVID-19<br><b>AND</b><br>Where the healthcare worker's mucous membranes or hands were exposed to potentially infectious materials for COVID-19                                                                                                      |
| High risk                 | Healthcare workers who performed aerosol-generating procedures or were present in the room during the procedure or performed procedures of which respiratory secretions are likely to be poorly controlled on patients with COVID-19<br><b>AND</b><br>When the healthcare worker's eyes, nose, or mouth were not protected |

Note: Procedures that could induce uncontrolled respiratory secretions include cardiopulmonary resuscitation, intubation and extubating, non-invasive ventilation, bronchoscopy, nebulizer therapy and sputum induction procedures.

Source: UMMC, 2020
