# Supplementary material
Source: PubMed Central journal article supplement (PMC8656068)
Supplement: 12879_2021_6894_MOESM2_ESM.pdf [file 12879_2021_6894_MOESM2_ESM.pdf]

Additional File 2: Demographic and epidemiological characteristics of patient-cases with community and hospital-onset of COVID-19

|                                        | All patient-cases    | Patient-cases with community-onset | Patient-cases with hospital-onset |
|----------------------------------------|----------------------|------------------------------------|-----------------------------------|
| Count, n                               | 9                    | 5                                  | 4                                 |
| Age* in years, median [IQR]            | 80.0<br>[74.0, 81.0] | 80.0<br>[77.0, 81.0]               | 77.5<br>[73.8, 8.0]               |
| Female (%)                             | 6 (66.7)             | 5 (100.0)                          | 1 (25.0)                          |
| Symptomatic (%)                        | 7 (77.8)             | 5 (100.0)                          | 2 (50.0)                          |
| Fever                                  | 5 (55.6)             | 4 (80.0)                           | 1 (25.0)                          |
| Cough                                  | 4 (44.4)             | 3 (60.0)                           | 1 (25.0)                          |
| Sore throat*                           | 1 (11.1)             | 1 (20.0)                           | -                                 |
| Coryza                                 | -                    | -                                  | -                                 |
| Anosmia                                | -                    | -                                  | -                                 |
| Dyspnoea                               | 1 (1)                | 1 (20.0)                           | -                                 |
| Gastrointestinal symptoms              | 3 (33.3)             | 3 (60.0)                           | -                                 |
| Lethargy                               | -                    | -                                  | -                                 |
| Previous comorbidities* (%)            | 9 (100.0)            | 5 (100.0)                          | 4 (100.0)                         |
| Diabetes mellitus                      | 7 (77.8)             | 4 (80.0)                           | 3 (75.0)                          |
| Hypertension                           | 8 (88.9)             | 5 (100.0)                          | 3 (75.0)                          |
| Cardiovascular disease                 | 5 (55.6)             | 2 (40.0)                           | 3 (75.0)                          |
| Hyperlipidaemia                        | 6 (66.7)             | 3 (60.0)                           | 3 (75.0)                          |
| Chronic kidney disease                 | 3 (33.3)             | 2 (40.0)                           | 1 (25.0)                          |
| History of cancer                      | -                    | -                                  | -                                 |
| Other comorbidities                    | 7 (77.8)             | 3 (60.0)                           | 4 (100.0)                         |
| Duration (in days), median [IQR]       |                      |                                    |                                   |
| Symptom onset to diagnosis             | 1.0<br>[0.0, 2.0]    | 1.0<br>[0.0, 2.0]                  | 1.0<br>[0.0, 3.0]                 |
| Symptom onset to admission to hospital | 1.0<br>[0.0, 2.0]    | 1.0<br>[1.0, 2.0]                  | 1.0<br>[0.0, 3.0]                 |
| Diagnosis to admission to hospital     | 0.0<br>[0.0, 0.0]    | 0.0<br>[0.0, 0.0]                  | 0.0<br>[0.0, 0.0]                 |
| Admission to discharge (n=5)           | 33.0<br>[33.0, 39.0] | 33.0<br>[33.0, 36.0]               | 23.0<br>[22.0, 24.0]              |

Notes:

Results are presented in median [interquartile range] for continuous variables and in the count (percentage) for categorical variables.

Gastrointestinal symptoms include nausea, vomiting, diarrhoea, and abdominal pain.
