# Supplementary material
Source: PubMed Central journal article supplement (PMC8656068)
Supplement: 12879_2021_6894_MOESM3_ESM.pdf [file 12879_2021_6894_MOESM3_ESM.pdf]

**Additional File 3. List of SARS-CoV-2 sequences generated in this study.**

| <b>Case code</b> | <b>Virus sequence name</b> | <b>GISAID accession ID</b> | <b>Collection date</b> | <b>Pangolin lineage</b> | <b>No. of raw reads</b> | <b>No. of mapped reads</b> | <b>Breadth of genome coverage (%)</b> | <b>Average depth of coverage</b> |
|------------------|----------------------------|----------------------------|------------------------|-------------------------|-------------------------|----------------------------|---------------------------------------|----------------------------------|
| AH1              | hCoV-19/Malaysia/0931/2020 | EPI_ISL_501180             | 23-Mar-20              | B.6.1                   | 36522                   | 36379                      | 99.76                                 | 345.25                           |
| AH4              | hCoV-19/Malaysia/2079/2020 | EPI_ISL_501190             | 26-Mar-20              | B.6.1                   | 43363                   | 43272                      | 99.89                                 | 407.68                           |
| AH5              | hCoV-19/Malaysia/2735/2020 | EPI_ISL_501195             | 28-Mar-20              | B.6.1                   | 50720                   | 50584                      | 99.96                                 | 473.83                           |
| AH6              | hCoV-19/Malaysia/2813/2020 | EPI_ISL_501197             | 28-Mar-20              | B.6.1                   | 7908                    | 7898                       | 99.78                                 | 74.95                            |
| AH7              | hCoV-19/Malaysia/6306/2020 | EPI_ISL_501219             | 07-Apr-20              | B.6.1                   | 53512                   | 53234                      | 99.78                                 | 504.7                            |
| AH8              | hCoV-19/Malaysia/3706/2020 | EPI_ISL_501209             | 31-Mar-20              | B.6.1                   | 45002                   | 44951                      | 99.82                                 | 422.46                           |
| AH9              | hCoV-19/Malaysia/3703/2020 | EPI_ISL_501208             | 31-Mar-20              | B.6.1                   | 41330                   | 41263                      | 99.78                                 | 387.17                           |
| AH10             | hCoV-19/Malaysia/2982/2020 | EPI_ISL_506998             | 29-Mar-20              | B.6.1                   | 61653                   | 56569                      | 94.3                                  | 553.5                            |
| AP1              | hCoV-19/Malaysia/2251/2020 | EPI_ISL_501192             | 27-Mar-20              | B.6.1                   | 310702                  | 308736                     | 99.91                                 | 3012.73                          |
| AP2              | hCoV-19/Malaysia/2065/2020 | EPI_ISL_501189             | 26-Mar-20              | B.6.1                   | 39250                   | 39151                      | 99.78                                 | 366.14                           |
| AP3              | hCoV-19/Malaysia/1713/2020 | EPI_ISL_501186             | 25-Mar-20              | B.6.1                   | 42713                   | 42636                      | 99.82                                 | 400.8                            |
| AP4              | hCoV-19/Malaysia/2363/2020 | EPI_ISL_501194             | 27-Mar-20              | B.6.1                   | 47159                   | 47049                      | 99.78                                 | 443.53                           |
| AP7              | hCoV-19/Malaysia/2101/2020 | EPI_ISL_501191             | 26-Mar-20              | B.6.1                   | 164955                  | 162989                     | 99.91                                 | 1582.45                          |
| AP9              | hCoV-19/Malaysia/5760/2020 | EPI_ISL_506999             | 23-Apr-20              | B.6.1                   | 147641                  | 82018                      | 94.24                                 | 796.88                           |
| AG1              | hCoV-19/Malaysia/5822/2020 | EPI_ISL_501214             | 06-Apr-20              | B.6.1                   | 38876                   | 38793                      | 99.83                                 | 364.42                           |
| AF1              | hCoV-19/Malaysia/5425/2020 | EPI_ISL_501212             | 04-Apr-20              | B.6.1                   | 46610                   | 46486                      | 99.86                                 | 437.5                            |
| AN3              | hCoV-19/Malaysia/3145/2020 | EPI_ISL_501202             | 30-Mar-20              | B.6.1                   | 44186                   | 44148                      | 99.78                                 | 417.71                           |
| AX1              | hCoV-19/Malaysia/3012/2020 | EPI_ISL_501199             | 29-Mar-20              | B.6                     | 733738                  | 724362                     | 99.9                                  | 7119.37                          |
| AX2              | hCoV-19/Malaysia/5906/2020 | EPI_ISL_501215             | 06-Apr-20              | B.6.6                   | 40657                   | 40579                      | 99.89                                 | 380.13                           |
| AX3              | hCoV-19/Malaysia/2063/2020 | EPI_ISL_501188             | 26-Mar-20              | B.6.6                   | 40839                   | 40663                      | 99.76                                 | 382.8                            |
| AX4              | hCoV-19/Malaysia/2811/2020 | EPI_ISL_501196             | 28-Mar-20              | B.6.6                   | 45799                   | 45679                      | 99.89                                 | 426.84                           |
